# Supplementary material for: A topological chemical transition strategy of bismuth-based materials for high-efficiency electrocatalytic carbon dioxide conversion to formate
Source: Royal Society of Chemistry journal article supplement (doi:10.1039/d2ta08521f), 2022-12-22
Supplement: d2ta08521f1.pdf [file d2ta08521f1.pdf]

## Supporting Information

### Topological Chemical Transition Strategy of Bismuth-based Materials for High-efficient Electrocatalytic Carbon Dioxide Conversion to Formate

*Runze Ye, Yun Tong,\* Dongmei Feng and Pengzuo Chen\**

Department of Chemistry, Key Laboratory of Surface & Interface Science of Polymer  
Materials of Zhejiang Province, Zhejiang Sci-Tech University, 928 Second Avenue,  
Xiasha High Education Zone, Hangzhou 310018, (P. R. China)

Correspondence and requests for materials should be addressed to Y. Tong (E-mail:  
tongyun@mail.ustc.edu.cn; pzchen@zstu.edu.cn)

## Table of contents

|                                                                                                                                                                                                                                                              |    |
|--------------------------------------------------------------------------------------------------------------------------------------------------------------------------------------------------------------------------------------------------------------|----|
| <b>Figure S1.</b> XPS survey spectrum of Bi <sub>2</sub> S <sub>3</sub> , Bi <sub>2</sub> O <sub>2</sub> SO <sub>4</sub> , and metal Bi samples. ....                                                                                                        | 3  |
| <b>Figure S2.</b> (a-b) The TEM images of Bi <sub>2</sub> S <sub>3</sub> precursor. ....                                                                                                                                                                     | 3  |
| <b>Figure S3.</b> (a-b) The TEM images of Bi <sub>2</sub> O <sub>2</sub> SO <sub>4</sub> . ....                                                                                                                                                              | 4  |
| <b>Figure S4.</b> (a-b) The TEM images of metal Bi.....                                                                                                                                                                                                      | 4  |
| <b>Figure S5.</b> Constant potential electrolysis of (a) Bi <sub>2</sub> S <sub>3</sub> , (b) Bi <sub>2</sub> O <sub>2</sub> SO <sub>4</sub> and (c) Bi at each applied potential in CO <sub>2</sub> saturated 0.5 M KHCO <sub>3</sub> . ....                | 5  |
| <b>Figure S6.</b> Stability test of the Bi catalyst at -0.9 V vs. RHE. ....                                                                                                                                                                                  | 6  |
| <b>Figure S7.</b> The XRD patterns of the Bi <sub>2</sub> O <sub>2</sub> SO <sub>4</sub> samples were synthesized at different reaction temperatures.....                                                                                                    | 6  |
| <b>Figure S8.</b> (a) LSV curves of the Bi <sub>2</sub> O <sub>2</sub> SO <sub>4</sub> samples that were synthesized at different reaction temperatures. (b) Corresponding FEs of these samples at -0.8 V. 7                                                 |    |
| <b>Figure S9.</b> (a) LSV curves of the surface treated Bi sample at different temperatures in air. (b) Corresponding FEs of these samples at -1.0 V. ....                                                                                                   | 7  |
| <b>Figure S10.</b> The CV curves of (a) Bi <sub>2</sub> S <sub>3</sub> , (b) Bi <sub>2</sub> O <sub>2</sub> SO <sub>4</sub> , and (c) Bi samples in 0.5 M KHCO <sub>3</sub> at scan rates of 20, 40, 60, 80,100, 200 mV s <sup>-1</sup> , respectively. .... | 8  |
| <b>Figure S11.</b> <sup>1</sup> H NMR spectra of Bi <sub>2</sub> O <sub>2</sub> SO <sub>4</sub> catalyst after the electrocatalytic CO <sub>2</sub> reduction in a flow cell.....                                                                            | 9  |
| <b>Figure S12.</b> The partial current density of formate for Bi <sub>2</sub> O <sub>2</sub> SO <sub>4</sub> catalyst at different applied potentials in a flow cell.....                                                                                    | 9  |
| <b>Figure S13.</b> The XRD pattern of Bi <sub>2</sub> S <sub>3</sub> catalyst on carbon paper before and after the electrocatalytic CO <sub>2</sub> reduction. ....                                                                                          | 10 |
| <b>Figure S14.</b> The XPS survey of Bi <sub>2</sub> O <sub>2</sub> SO <sub>4</sub> catalyst after the electrocatalytic CO <sub>2</sub> reduction.....                                                                                                       | 11 |
| <b>Figure S15.</b> The NMR calibration curve of DMSO. ....                                                                                                                                                                                                   | 11 |
| <b>Table S1.</b> Relevant parameters of Bi and Bi <sub>2</sub> O <sub>2</sub> SO <sub>4</sub> samples at -0.9 V vs. RHE....                                                                                                                                  | 12 |
| <b>Table S2.</b> Comparison of Bi <sub>2</sub> O <sub>2</sub> SO <sub>4</sub> with recently reported Bi-based electrocatalysts in H-type cell. ....                                                                                                          | 12 |
| <b>Table S3.</b> Comparison of Bi <sub>2</sub> O <sub>2</sub> SO <sub>4</sub> with recently reported electrocatalysts in a flow cell.....                                                                                                                    | 13 |
| <b>References:</b> .....                                                                                                                                                                                                                                     | 14 |

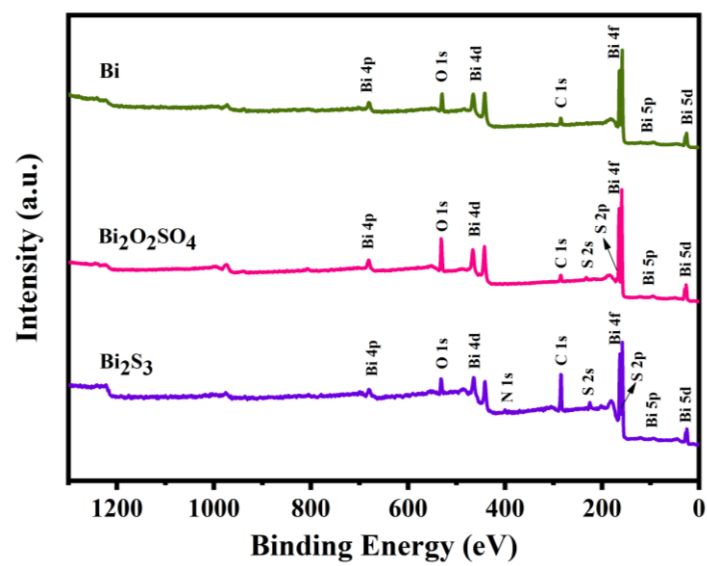

**Figure S1.** XPS survey spectrum of  $\text{Bi}_2\text{S}_3$ ,  $\text{Bi}_2\text{O}_2\text{SO}_4$ , and metal Bi samples.

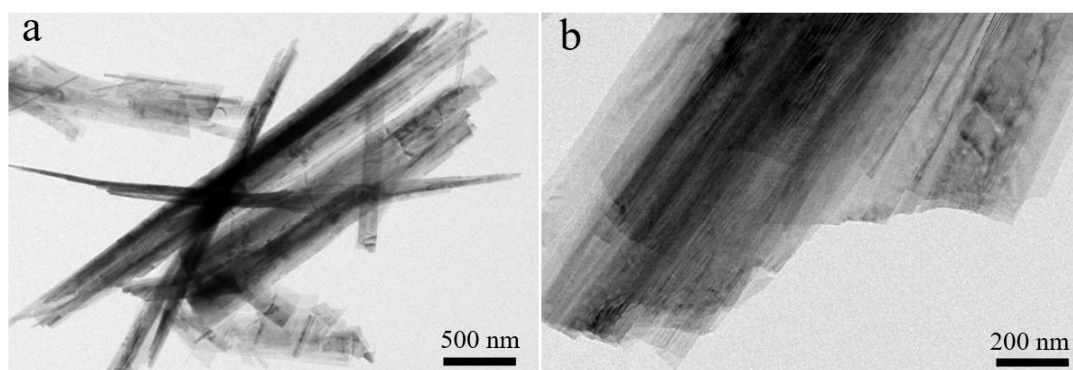

**Figure S2.** (a-b) The TEM images of  $\text{Bi}_2\text{S}_3$  precursor.

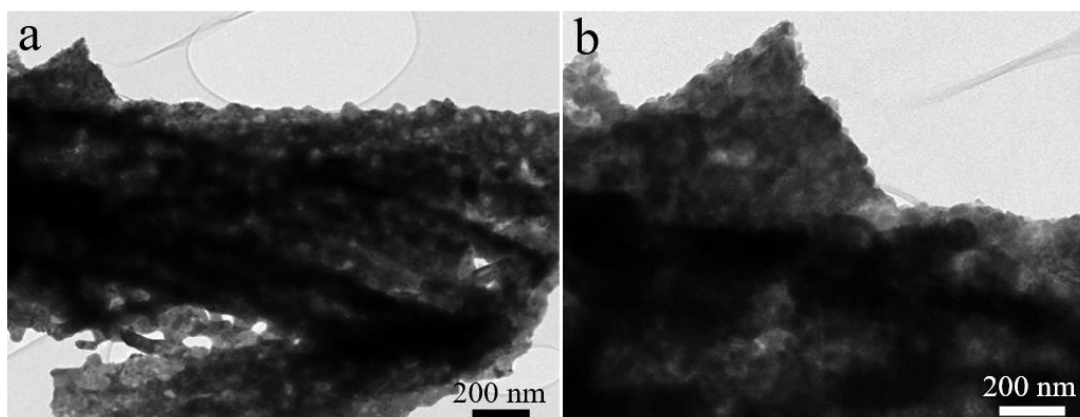

**Figure S3.** (a-b) The TEM images of  $\text{Bi}_2\text{O}_2\text{SO}_4$ .

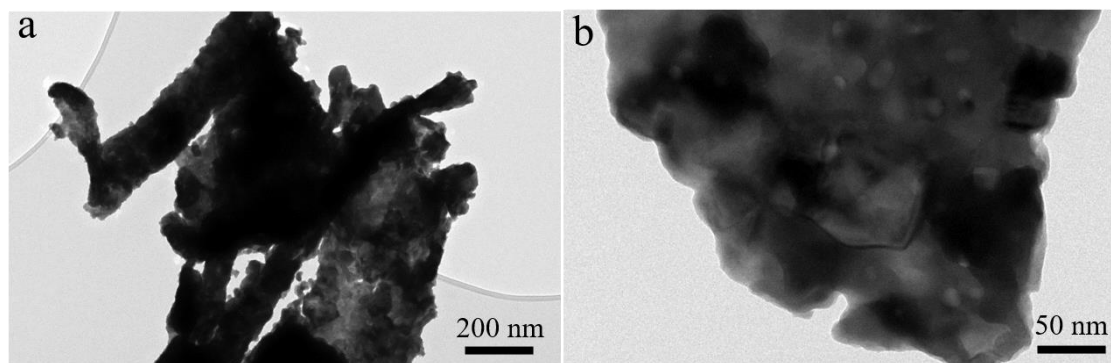

**Figure S4.** (a-b) The TEM images of metal Bi.

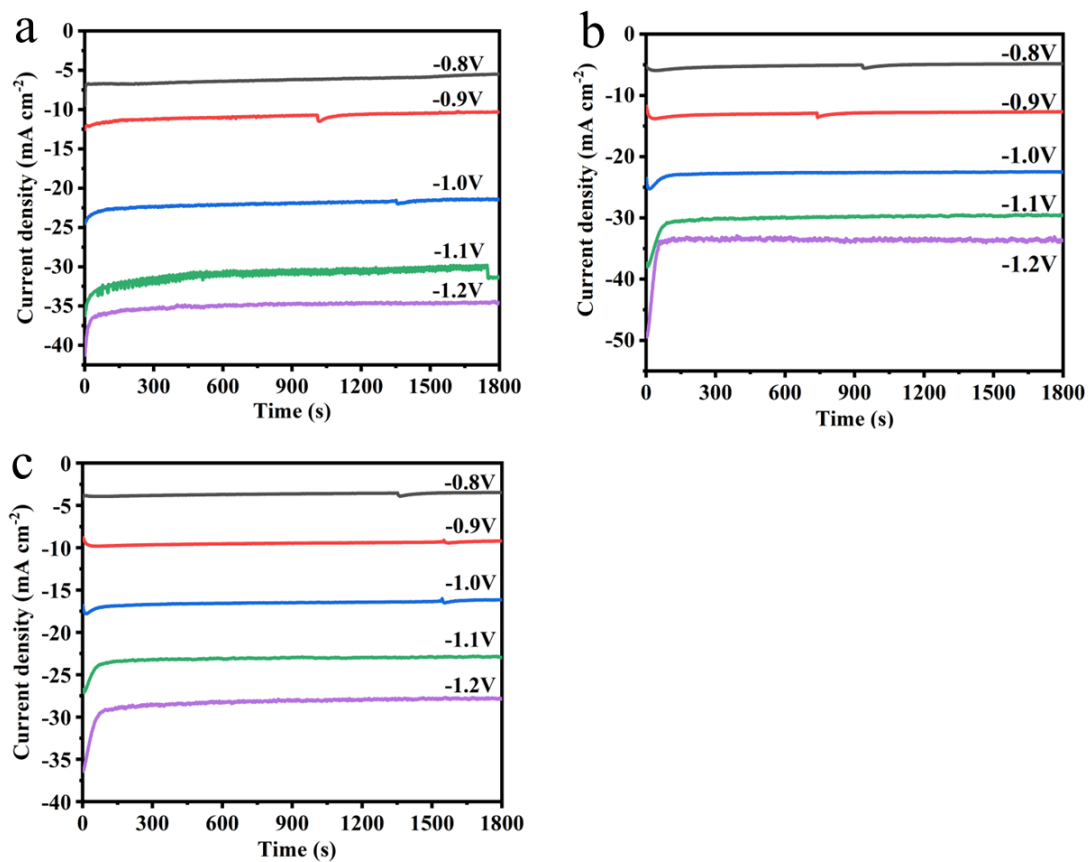

**Figure S5.** Constant potential electrolysis of (a)  $\text{Bi}_2\text{S}_3$ , (b)  $\text{Bi}_2\text{O}_2\text{SO}_4$  and (c)  $\text{Bi}$  at each applied potential in  $\text{CO}_2$  saturated  $0.5 \text{ M KHCO}_3$ .

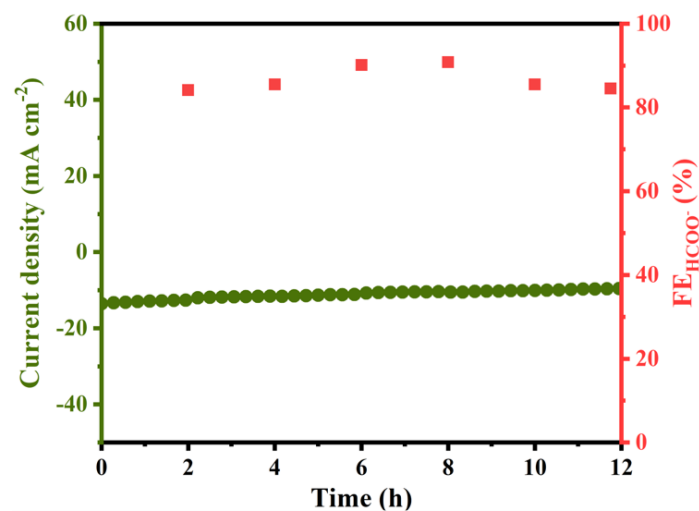

**Figure S6.** Stability test of the Bi catalyst at -0.9 V vs. RHE.

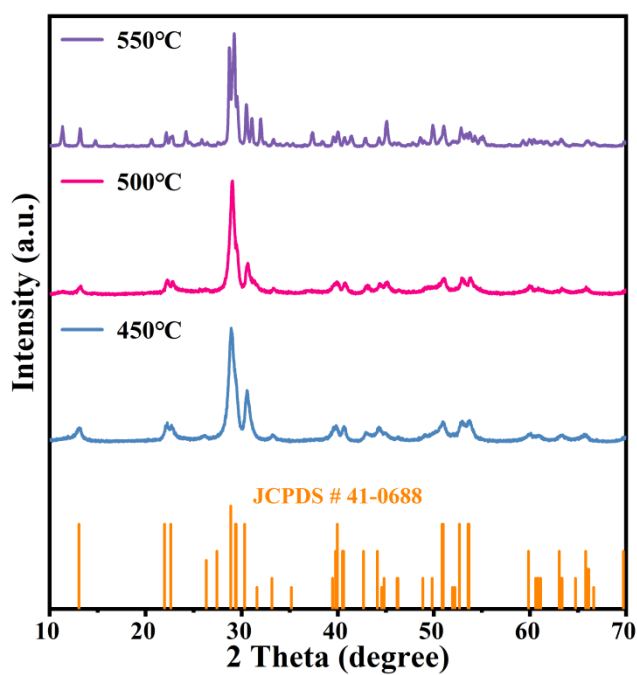

**Figure S7.** The XRD patterns of the Bi<sub>2</sub>O<sub>2</sub>SO<sub>4</sub> samples were synthesized at different reaction temperatures.

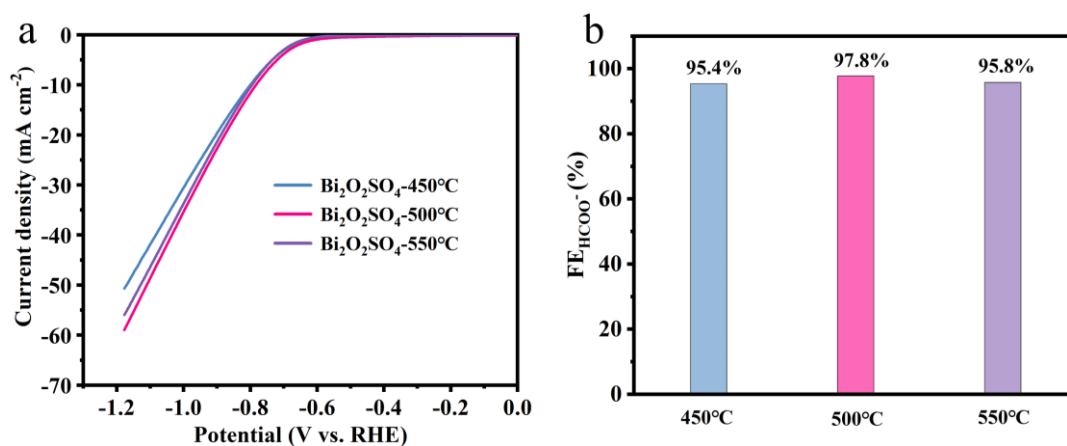

**Figure S8.** (a) LSV curves of the Bi<sub>2</sub>O<sub>2</sub>SO<sub>4</sub> samples that were synthesized at different reaction temperatures. (b) Corresponding FEs of these samples at -0.8 V.

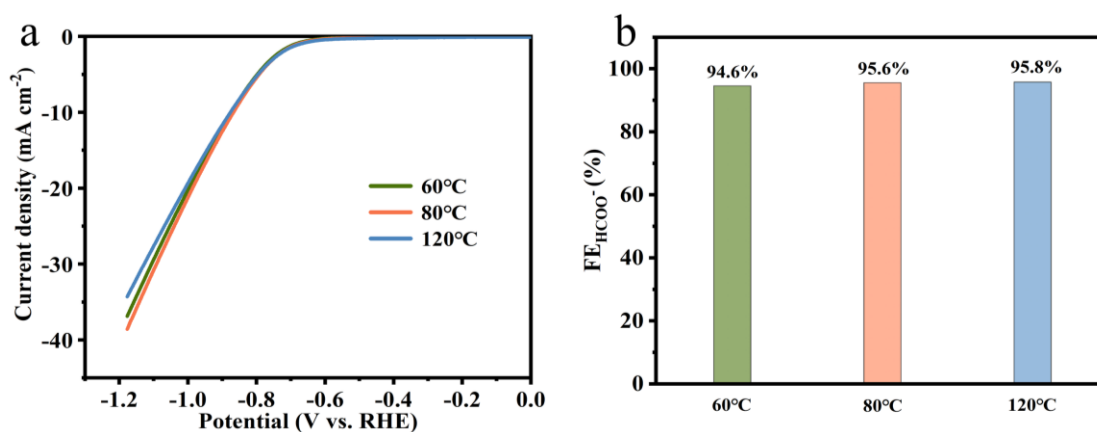

**Figure S9.** (a) LSV curves of the surface treated Bi sample at different temperatures in air. (b) Corresponding FEs of these samples at -1.0 V.

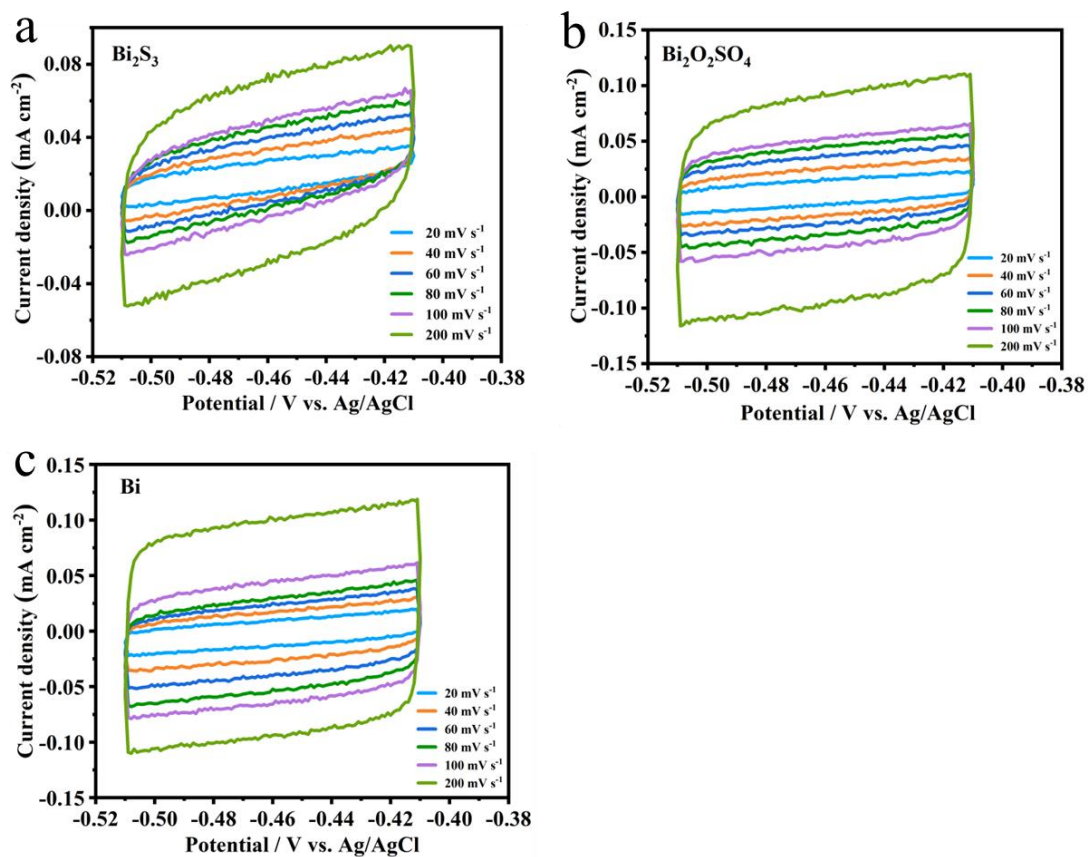

**Figure S10.** The CV curves of (a)  $\text{Bi}_2\text{S}_3$ , (b)  $\text{Bi}_2\text{O}_2\text{SO}_4$ , and (c) Bi samples in 0.5 M  $\text{KHCO}_3$  at scan rates of 20, 40, 60, 80, 100, 200  $\text{mV s}^{-1}$ , respectively.

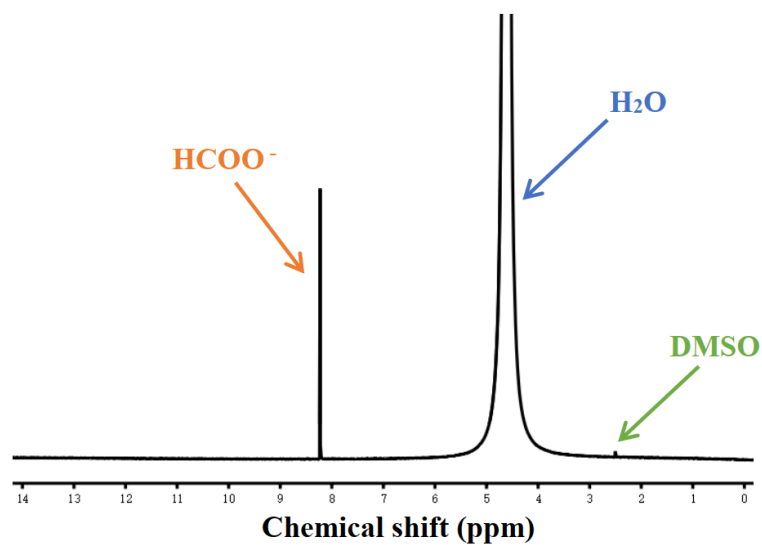

**Figure S11.**  $^1\text{H}$  NMR spectra of  $\text{Bi}_2\text{O}_2\text{SO}_4$  catalyst after the electrocatalytic  $\text{CO}_2$  reduction in a flow cell.

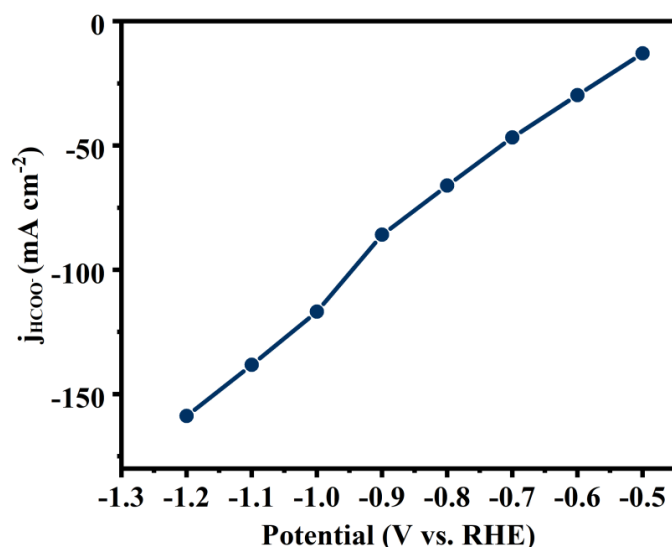

**Figure S12.** The partial current density of formate for  $\text{Bi}_2\text{O}_2\text{SO}_4$  catalyst at different applied potentials in a flow cell.

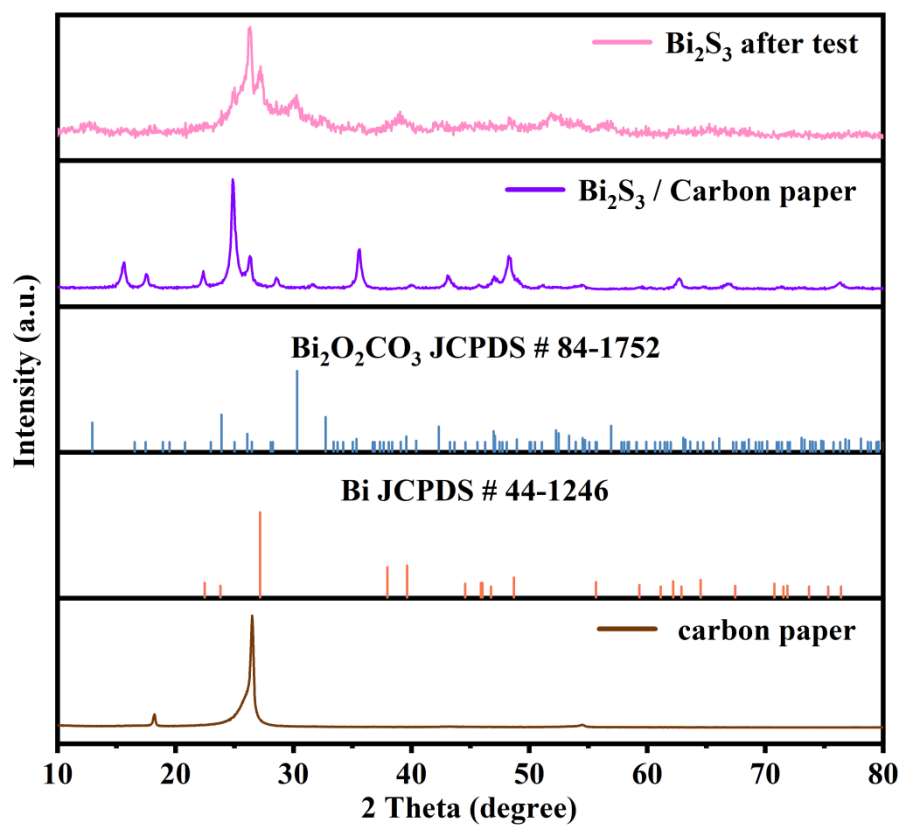

**Figure S13.** The XRD pattern of  $\text{Bi}_2\text{S}_3$  catalyst on carbon paper before and after the electrocatalytic  $\text{CO}_2$  reduction.

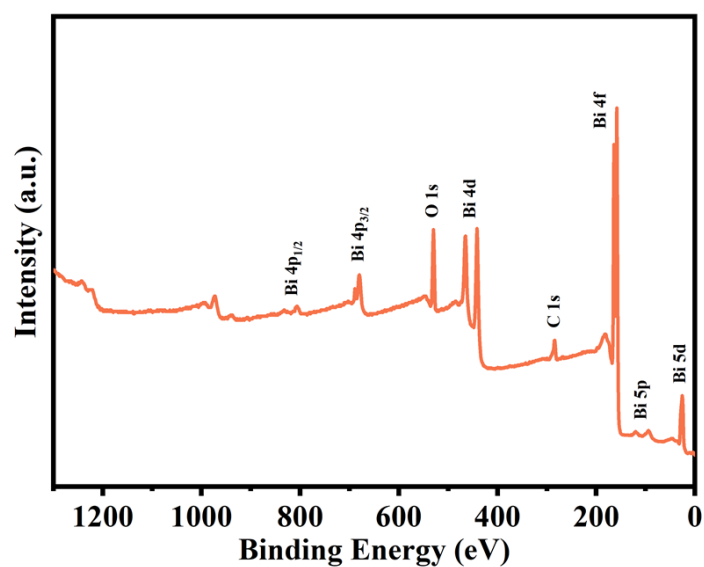

**Figure S14.** The XPS survey of  $\text{Bi}_2\text{O}_2\text{SO}_4$  catalyst after the electrocatalytic  $\text{CO}_2$  reduction.

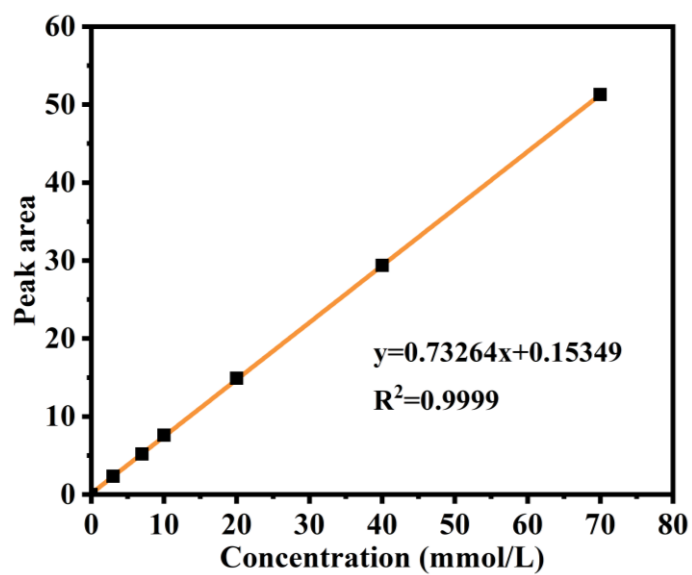

**Figure S15.** The NMR calibration curve of DMSO.

**Table S1.** Relevant parameters of Bi and Bi<sub>2</sub>O<sub>2</sub>SO<sub>4</sub> samples at -0.9 V vs. RHE.

| Sample                                         | $j_{\text{formate}}$ at -0.9 V vs. RHE<br>(mA cm <sup>-2</sup> ) | $C_{\text{dl}}$<br>(mF cm <sup>-2</sup> ) | $j_{\text{formate}}'$ at -0.9 V vs. RHE per $C_{\text{dl}}$<br>(mA cm <sup>-2</sup> ) |
|------------------------------------------------|------------------------------------------------------------------|-------------------------------------------|---------------------------------------------------------------------------------------|
| Bi                                             | 8.53                                                             | 0.48                                      | 17.77                                                                                 |
| Bi <sub>2</sub> O <sub>2</sub> SO <sub>4</sub> | 12.56                                                            | 0.46                                      | 27.3                                                                                  |

**Table S2.** Comparison of Bi<sub>2</sub>O<sub>2</sub>SO<sub>4</sub> with recently reported Bi-based electrocatalysts in H-type cell.

| Catalyst                                                  | Electrolyte              | Maximum FE <sub>formate</sub> with<br>the applied potential (vs.<br>RHE) | Potential ranges<br>(mV)<br>for FE <sub>formate</sub> > 80% | Ref          |
|-----------------------------------------------------------|--------------------------|--------------------------------------------------------------------------|-------------------------------------------------------------|--------------|
| Bi <sub>2</sub> O <sub>2</sub> SO <sub>4</sub> reduced Bi | 0.5 M KHCO <sub>3</sub>  | 97% at -0.9 V                                                            | 400                                                         | This<br>work |
| OD-BiNSs                                                  | 0.5 M KHCO <sub>3</sub>  | 93% at -0.95 V                                                           | 200                                                         | [1]          |
| Pits-Bi NS                                                | 0.1 M KHCO <sub>3</sub>  | 95.3% at -1.14V                                                          | 400                                                         | [2]          |
| 2D Bi NSs                                                 | 0.5 M KHCO <sub>3</sub>  | 95% at -0.9 V                                                            | 400                                                         | [3]          |
| Bi nanosheets                                             | 0.5 M KHCO <sub>3</sub>  | 91.3% at -1.0 V                                                          | 600                                                         | [4]          |
| Bi-BTB                                                    | 0.5 M KHCO <sub>3</sub>  | 96.1% at -0.669 V                                                        | 500                                                         | [5]          |
| Bi Nanotubes                                              | 0.5 M KHCO <sub>3</sub>  | 97% at -1.0 V                                                            | 600                                                         | [6]          |
| Mesoporous Bi NSs                                         | 0.5 M KHCO <sub>3</sub>  | 95.9% at -0.77 V                                                         | 300                                                         | [7]          |
| Bi nanostructure                                          | 0.5 M KHCO <sub>3</sub>  | 92% at -0.9 V                                                            | 400                                                         | [8]          |
| SD-Bi                                                     | 0.5 M NaHCO <sub>3</sub> | 84.0% at -0.75 V                                                         | 200                                                         | [9]          |
| 2D Bi NSs                                                 | 0.1 M KHCO <sub>3</sub>  | 86.0% at -1.1 V                                                          | 200                                                         | [10]         |

**Table S3.** Comparison of Bi<sub>2</sub>O<sub>2</sub>SO<sub>4</sub> with recently reported electrocatalysts in a flow cell.

| Catalyst                                                    | Electrolyte             | Maximum FE <sub>formate</sub> with the applied potential (vs. RHE) | Potential ranges (mV) for FE <sub>formate</sub> > 90% | Ref              |
|-------------------------------------------------------------|-------------------------|--------------------------------------------------------------------|-------------------------------------------------------|------------------|
| <b>Bi<sub>2</sub>O<sub>2</sub>SO<sub>4</sub> reduced Bi</b> | <b>1.0 M KOH</b>        | <b>97.2% at -1.2V</b>                                              | <b>700</b>                                            | <b>This work</b> |
| InS Nanorods                                                | 1.0 M KOH               | 94% at - 0.7 V                                                     | 500                                                   | [11]             |
| Bi <sub>2</sub> O <sub>3</sub> @C-800                       | 1.0 M KOH               | 95% at -0.7 V                                                      | 700                                                   | [12]             |
| Bi-300                                                      | 1.0 M KOH               | 100% at -0.7 V                                                     | 100                                                   | [13]             |
| InN nanosheet                                               | 1.0 M KOH               | 91% at -0.9V                                                       | 100                                                   | [14]             |
| Bi-SnO <sub>x</sub>                                         | 1.0 M KOH               | 94.6 % at -0.51 V                                                  | 200                                                   | [15]             |
| SnO <sub>2</sub> -Bi <sub>2</sub> O <sub>3</sub>            | 1.0 M KOH               | 91% at -1.29 V                                                     | 100                                                   | [16]             |
| Bi@Sn NPs                                                   | 2.0 M KHCO <sub>3</sub> | 95% at -1.02 V                                                     | 350                                                   | [17]             |
| Bi NRs                                                      | 1.0 M KOH               | >95%                                                               | 600                                                   | [18]             |
| In-Sn alloy                                                 | 1.0 M KOH               | 94% at -0.98 V                                                     | 550                                                   | [19]             |
| ZnIn <sub>2</sub> S <sub>4</sub>                            | 1.0 M KHCO <sub>3</sub> | 99.3% at -1.18 V                                                   | 300                                                   | [20]             |

## References:

- [1] Lee J, Liu H, Chen Y, et al. Bismuth Nanosheets Derived by In Situ Morphology Transformation of Bismuth Oxides for Selective Electrochemical CO<sub>2</sub> Reduction to Formate. *ACS Appl. Mater. Interfaces*, **2022**, 14(12): 14210-14217.
- [2] Yuan Y, Wang Q, Qiao Y, et al. In Situ Structural Reconstruction to Generate the Active Sites for CO<sub>2</sub> Electroreduction on Bismuth Ultrathin Nanosheets. *Adv. Mater*, **2022**, 12(29): 2200970.
- [3] Liu P, Liu H, Zhang S, et al. A general strategy for obtaining BiO<sub>x</sub> nanoplates derived Bi nanosheets as efficient CO<sub>2</sub> reduction catalysts by enhancing CO<sub>2</sub><sup>-</sup> adsorption and electron transfer. *J. Colloid Interface Sci.*, **2021**, 602: 740-747.
- [4] Wang D, Wang Y, Chang K, et al. Residual iodine on in-situ transformed bismuth nanosheets induced activity difference in CO<sub>2</sub> electroreduction. *J. CO<sub>2</sub> Util.*, **2022**, 55: 101802.
- [5] Yuan W W, Wu J X, Zhang X D, et al. In situ transformation of bismuth metal–organic frameworks for efficient selective electroreduction of CO<sub>2</sub> to formate. *J. Mater. Chem. A*, **2020**, 8(46): 24486-24492.
- [6] Fan K, Jia Y, Ji Y, et al. Curved surface boosts electrochemical CO<sub>2</sub> reduction to formate via bismuth nanotubes in a wide potential window. *ACS Catal*, **2019**, 10(1): 358-364.
- [7] Wu D, Liu J, Liang Y, et al. Electrochemical Transformation of Facet-Controlled BiOI into Mesoporous Bismuth Nanosheets for Selective Electrocatalytic Reduction of CO<sub>2</sub> to Formic Acid. *ChemSusChem*, **2019**, 12(20): 4700-4707.
- [8] Lu P, Gao D, He H, et al. Facile synthesis of a bismuth nanostructure with enhanced selectivity for electrochemical conversion of CO<sub>2</sub> to formate. *Nanoscale*, **2019**, 11(16): 7805-7812.
- [9] Zhang Y, Li F, Zhang X, et al. Electrochemical reduction of CO<sub>2</sub> on defect-rich Bi derived from Bi<sub>2</sub>S<sub>3</sub> with enhanced formate selectivity. *J. Mater. Chem. A*, **2018**, 6(11): 4714-4720.
- [10] Zhang W, Hu Y, Ma L, et al. Liquid-phase exfoliated ultrathin Bi nanosheets:

- uncovering the origins of enhanced electrocatalytic CO<sub>2</sub> reduction on two-dimensional metal nanostructure. *Nano Energy*, **2018**, 53: 808-816.
- [11] Zhang Y, Lan J, Xie F, et al. Aligned InS Nanorods for Efficient Electrocatalytic Carbon Dioxide Reduction. *ACS Appl. Mater. Interfaces*, **2022**, 14(22), 25257-25266.
- [12] Yi L, Chen J, Shao P, et al. Molten-salt-assisted synthesis of bismuth nanosheets for long-term continuous electrocatalytic conversion of CO<sub>2</sub> to formate. *Angew. Chem. Int. Ed.*, **2020**, 59(45): 20112-20119.
- [13] Deng P, Yang F, Wang Z, et al. Metal–Organic Framework-Derived Carbon Nanorods Encapsulating Bismuth Oxides for Rapid and Selective CO<sub>2</sub> Electroreduction to Formate. *Angew. Chem. Int. Ed.*, **2020**, 132(27): 10899 - 10905.
- [14] Zhang A, Liang Y, Li H, et al. In-situ surface reconstruction of InN nanosheets for efficient CO<sub>2</sub> electroreduction into formate. *Nano Lett.*, **2020**, 20(11): 8229-8235.
- [15] Yang Q, Wu Q, Liu Y, et al. Novel Bi-Doped Amorphous SnO<sub>x</sub> Nanoshells for Efficient Electrochemical CO<sub>2</sub> Reduction into Formate at Low Overpotentials. *Adv. Mater.*, **2020**, 32(36): 2002822.
- [16] Wang X, Wang W, Zhang J, et al. Carbon sustained SnO<sub>2</sub>-Bi<sub>2</sub>O<sub>3</sub> hollow nanofibers as Janus catalyst for high-efficiency CO<sub>2</sub> electroreduction. *Chem. Eng. J.*, **2021**, 426: 131867.
- [17] Xing Y, Kong X, Guo X, et al. Bi@Sn core–shell structure with compressive strain boosts the electroreduction of CO<sub>2</sub> into formic acid. *Adv. Sci.*, **2020**, 7(22): 1902989.
- [18] Li Y, Chen J, Chen S, et al. In Situ Confined Growth of Bismuth Nanoribbons with Active and Robust Edge Sites for Boosted CO<sub>2</sub> Electroreduction. *ACS Energy Lett.*, **2022**, 7(4): 1454-1461.
- [19] Wang J, Ning S, Luo M, et al. In-Sn alloy core-shell nanoparticles: In-doped SnO<sub>x</sub> shell enables high stability and activity towards selective formate production from electrochemical reduction of CO<sub>2</sub>. *Appl. Catal. B*, **2021**, 288:119979.

- [20] Chi L P, Niu Z Z, Zhang X L, et al. Stabilizing indium sulfide for CO<sub>2</sub> electroreduction to formate at high rate by zinc incorporation. *Nat. Commun*, **2021**, *12(1)*: 1-9.
